# Supplementary material for: The Preparation of CuInS2-ZnS-Glutathione Quantum Dots and Their Application on the Sensitive Determination of Cytochrome c and Imaging of HeLa Cells
Source: PubMed Central journal article supplement — ACS Omega. 2021 Jun 30;6(27):17501–9. doi: 10.1021/acsomega.1c01983 (PMC8280654; doi:10.1021/acsomega.1c01983), 2021-06-30
Supplement: ao1c01983_si_001.pdf [file ao1c01983_si_001.pdf]

## Supporting Information

# The Preparation of CuInS<sub>2</sub>-ZnS-Glutathione Quantum Dots and its Application on the Sensitive Determination of Cytochrome c and Imaging of HeLa Cells

Xiangyang An<sup>a</sup>, Yuemei Zhang<sup>a</sup>, Jing Wang<sup>a</sup>, De-ming Kong<sup>a,b,c</sup>, Xi-wen He<sup>a</sup>, Langxing Chen<sup>\*a,b,c</sup>, and Yukui Zhang<sup>a,d</sup>

<sup>a</sup>College of Chemistry, Nankai University, Tianjin 300071, P. R. China.

<sup>b</sup>Tianjin Key Laboratory of Biosensing and Molecular Recognition, Nankai University, Tianjin 300071, P. R. China.

<sup>c</sup>State Key Laboratory of Medicinal Chemical Biology, Nankai University, Tianjin 300071, P. R. China.

<sup>d</sup>Dalian Institute of Chemical Physics, Chinese Academy of Sciences, Dalian 116023, P. R. China.

**Corresponding author: \*Prof. L. X. Chen**

**E-mail: [lxchen@nankai.edu.cn](mailto:lxchen@nankai.edu.cn)**

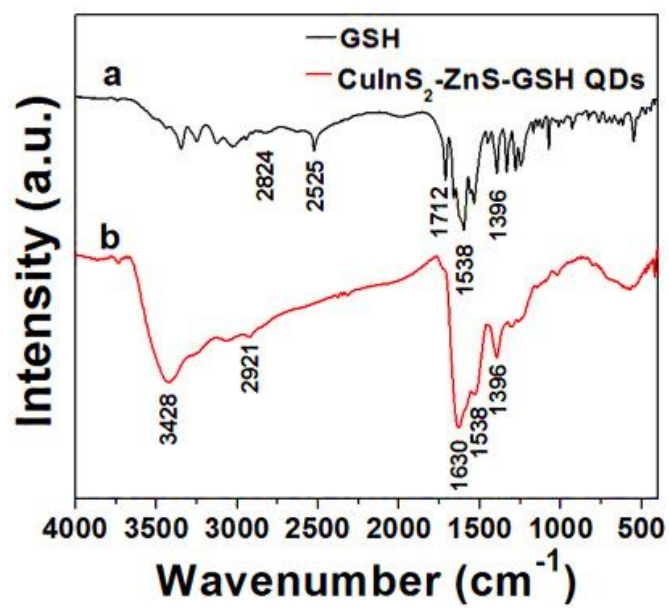

**Figure S1.** FT-IR spectrum of GSH (a) and CuInS<sub>2</sub>-ZnS-GSH QDs (b).

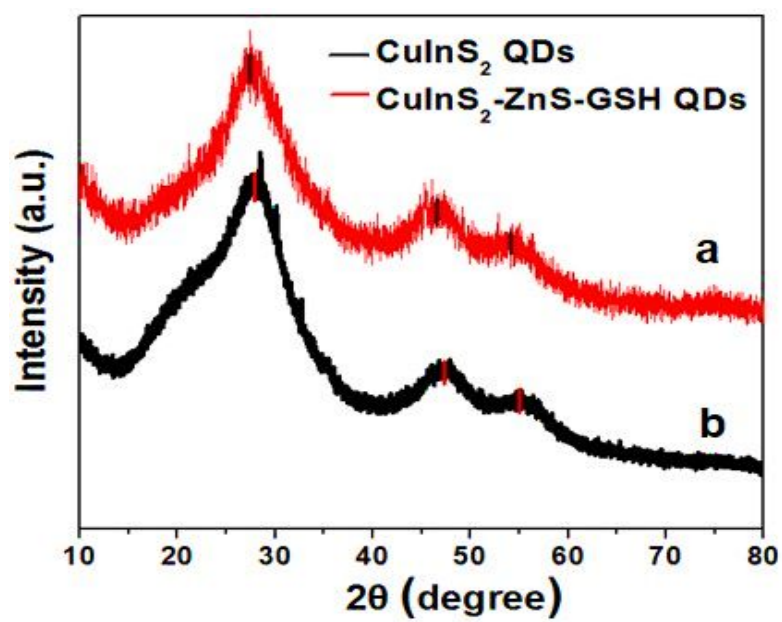

**Figure S2.** XRD patterns of CuInS<sub>2</sub>-ZnS QDs (a) and CuInS<sub>2</sub>-ZnS-GSH QDs (b).

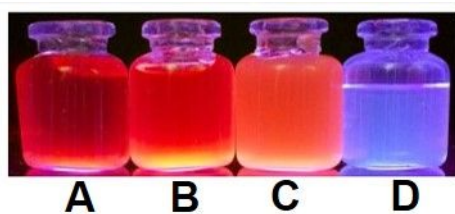

**Figure S3.** The influence of ZnS shell on the optical properties of CuInS<sub>2</sub> QDs. From left to right (A-D), the CuInS<sub>2</sub>-ZnS-GSH QDs were prepared with molar mass of Cu<sup>2+</sup> precursor of 0.01, 0.01, 0.01, and 0.0006 mmol, respectively, and the corresponding Zn<sup>2+</sup> precursor of 0.16, 0.08, 0.01, and 0.01 mmol, respectively.

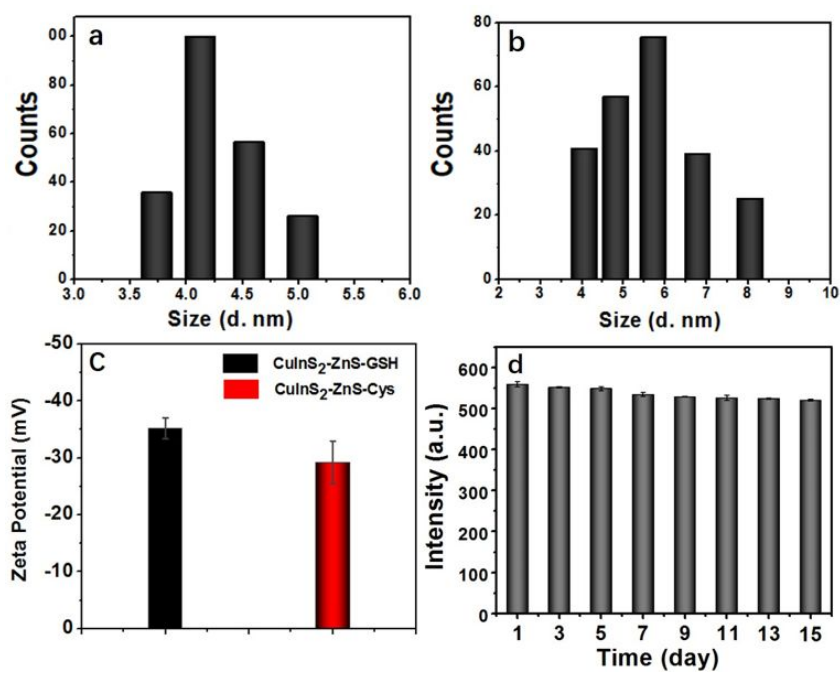

**Figure S4.** Hydrodynamic diameter variation of CuInS<sub>2</sub> (a) and CuInS<sub>2</sub>-ZnS-GSH QDs (b). (c) The zeta potential of CuInS<sub>2</sub>-ZnS-GSH QDs and CuInS<sub>2</sub>-ZnS-Cys QDs in PBS (9.0). (d) PL intensity change of CuInS<sub>2</sub>-ZnS-GSH QDs during a period of 15 days (n=3).

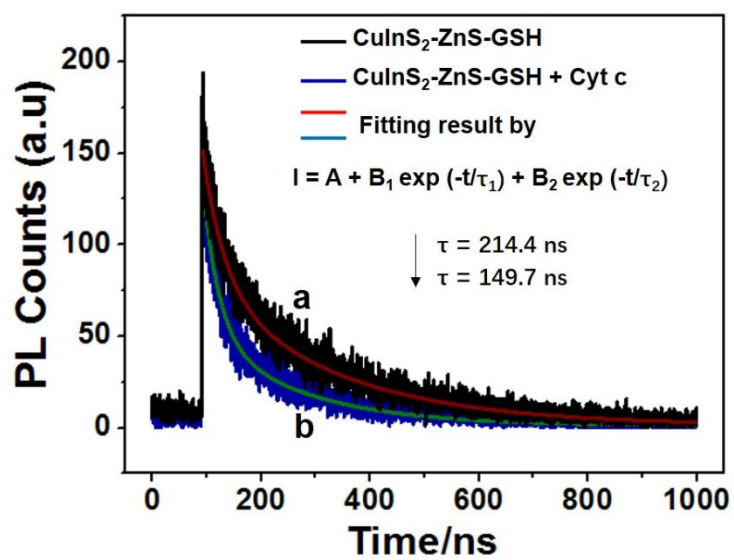

**Figure S5.** PL decay curve of CuInS<sub>2</sub>-ZnS-GSH (a) and CuInS<sub>2</sub>-ZnS-GSH QDs in Cyt c solution (b).

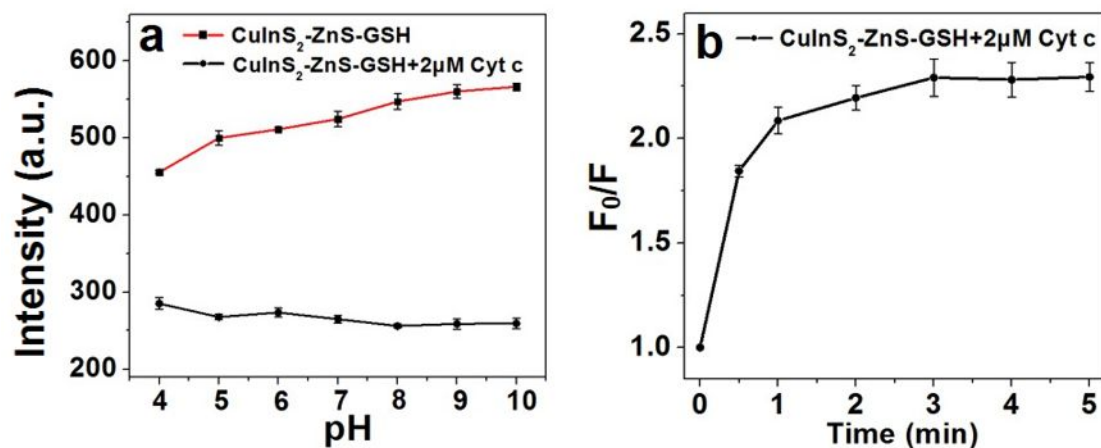

**Figure S6.** Effect of pH (a) and incubated time (b) on the detection of Cyt c by CuInS<sub>2</sub>-ZnS-GSH QDs. The error bars represent the standard deviations from the mean of three independent experiments.

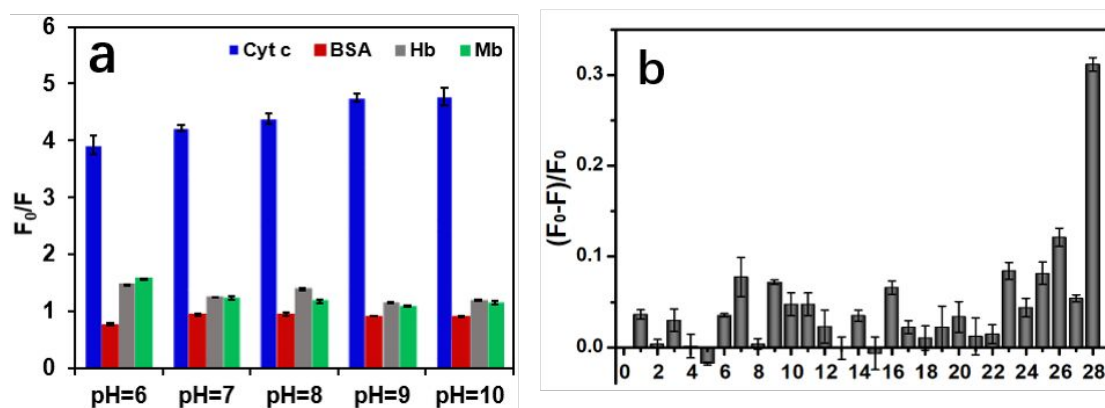

**Figure S7.** (a) The selectivity response of CuInS<sub>2</sub>-ZnS-GSH QDs towards Cyt c, Mb, Hb and BSA at different pH in the presence of 10  $\mu\text{mol L}^{-1}$  for Cyt c, BSA, Hb, and Mb respectively; (b) Selectivity of CuInS<sub>2</sub>-ZnS-GSH QDs for Cyt c determination detection. From column 1 to 11, Cys, Glc, Asp, Tyr, Lys, Thr, Ser, Arg, Glu, ATP and urea at a concentration of 200  $\mu\text{mol L}^{-1}$ ; From column 12 to 21, Fe<sup>3+</sup>, Na<sup>+</sup>, K<sup>+</sup>, Fe<sup>2+</sup>, Ca<sup>2+</sup>, Mg<sup>2+</sup>, CO<sub>3</sub><sup>2-</sup>, Cl<sup>-</sup>, SO<sub>4</sub><sup>2-</sup>, or NO<sub>3</sub><sup>-</sup> at a concentration of 80  $\mu\text{mol L}^{-1}$ ; BSA, Hb, HSA, Mb, Lyz and IgG at a concentration of 2  $\mu\text{mol L}^{-1}$ ; Column 28, Cyt c at a concentration of 0.4  $\mu\text{mol L}^{-1}$ . The error bars represent the standard deviations from the mean of three independent experiments.



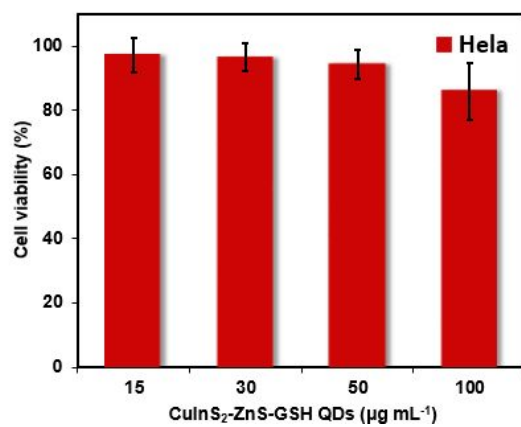

**Figure S8.** Cell viability of HeLa cells in the presence of various concentration of CuInS<sub>2</sub>-ZnS-GSH QDs. The error bars represent the standard deviations from the mean of three independent experiments.

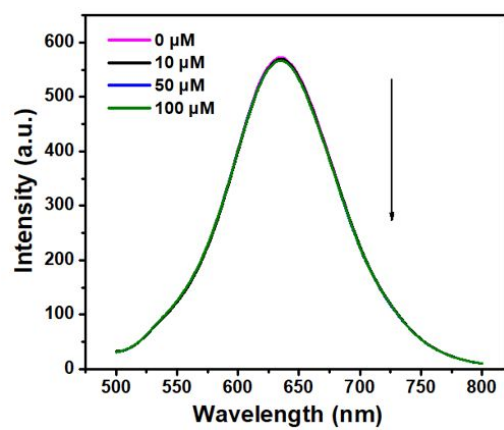

**Figure S9.** Fluorescence spectra of CuInS<sub>2</sub>-ZnS-GSH QDs in the presence of various concentrations of etoposide.

**Table S1.** The PL lifetime of CuInS<sub>2</sub>-ZnS-GSH QDs in PBS, Cyt c and BSA solution, respectively.

|                                          | $\chi^2$     | $\tau_1$ (ns) | Rel%         | $\tau_2$ (ns) | Rel%         | $\tau$ (ns)  |
|------------------------------------------|--------------|---------------|--------------|---------------|--------------|--------------|
| <b>CuInS<sub>2</sub>-ZnS-GSH</b>         | <b>1.109</b> | <b>38.8</b>   | <b>12.77</b> | <b>240.1</b>  | <b>87.23</b> | <b>214.4</b> |
| <b>CuInS<sub>2</sub>-ZnS-GSH +Cyt c</b>  | <b>1.078</b> | <b>29.1</b>   | <b>21.10</b> | <b>182.0</b>  | <b>78.90</b> | <b>149.7</b> |
| <b>CuInS<sub>2</sub>-ZnS-GSH QDs+BSA</b> | <b>1.155</b> | <b>37.0</b>   | <b>12.64</b> | <b>239.4</b>  | <b>87.36</b> | <b>213.8</b> |

**Table S2.** The comparison of methods for the determination of Cyt c.

| Method                | Material                                | Bioimaging             | Detection range               | Detection limit    | Comment                                                                            | Ref.      |
|-----------------------|-----------------------------------------|------------------------|-------------------------------|--------------------|------------------------------------------------------------------------------------|-----------|
| Turn-off fluorescence | Hb/Au NCs<br>DNA/Ag NCs                 | embryonic kidney cells | 0-10 $\mu$ M<br>0-1.0 $\mu$ M | 14.3 nM<br>15.7 nM | Time,5 s; Aptamer,high-cost; Relatively simple                                     | 1         |
| HPLC                  |                                         | /                      | 0-40 pM                       | 0.1 pM             | Time,20 min; Operation complex                                                     | 2         |
| Turn-on fluorescence  | Aptamer/g-C <sub>3</sub> N <sub>4</sub> | Hela cells             | 16-140 nM                     | 2.6 nM             | Time,10 min; Aptamer,high-cost; low-toxicity                                       | 3         |
| Fluorescence          | GQDs/GO                                 | A549 cells             | 0.25-14 $\mu$ M               | 0.25 $\mu$ M       | Time,10 s; High detection limit ; low-toxicity                                     | 4         |
| Turn-off fluorescence | TGA/CdTe QDs                            | SKIN cells             | 0.5-2.5 $\mu$ M               | 0.5 $\mu$ M        | narrow linearity range; heavy metal ion contained                                  | 5         |
| Electrochemical       | AuNP/PDA                                | /                      | 0.1–100 $\mu$ M               | 30 nM              | Time 1 h, Antibody ,high cost; Operation complex                                   | 6         |
| MIP                   | N-GQDs/SiO <sub>2</sub> /MIP            | /                      | 0.2-60 $\mu$ M                | 0.11 $\mu$ M       | Time 10 min; Operation complex                                                     | 7         |
| ICP-MS                | Aptamer-AuNPs                           | /                      | 0.1-20 nM                     | 0.03 nM            | Time 8 h; Instrument expensive; Aptamer,high cost                                  | 8         |
| Turn-off fluorescence | CIS-ZnS-GSH QDs                         | Hela cells             | 0.01-7 $\mu$ M                | 1.1 nM             | Time 4 min; Labor-free, Low-cost; low- toxicity; high selectivity (Hb, Mb and BSA) | This work |

## References

1. Shamsipur, M., Molaabasi, F., Hosseinkhani, S. & Rahmati, F. Detection of Early Stage Apoptotic Cells Based on Label-Free Cytochrome c Assay Using Bioconjugated Metal Nanoclusters as Fluorescent Probes. *Anal. Chem.* **2016**, *88*, 2188-2197.
2. Crouser, E. D.; Gadd, M. E.; Julian, M. W.; Huff, J. E.; Broekemeier, K. M.; Robbins, K. A.; Pfeiffer, D. R. Quantitation of cytochrome c release from rat liver mitochondria. *Anal. Biochem.* **2003**, *317*, 67-75.
3. Salehnia, F.; Hosseini, M.; Ganjali, M. R. A fluorometric aptamer based assay for cytochrome C using fluorescent graphitic carbon nitride nanosheets. *Microchimica. Acta* **2017**, *184*, 2157-2163.
4. Cao, L.; Li, X. Q.; Qin, L. X.; Kang, S. Z.; Li, G. D. Graphene quantum dots supported by graphene oxide as a sensitive fluorescence nanosensor for cytochrome c detection and intracellular imaging. *J. Mater. Chem. B* **2017**, *5*, 6300-6306.

5. Amin, R. M.; Elfeky, S. A.; Verwanger, T.; Krammer, B. Fluorescence-based CdTe nanosensor for sensitive detection of cytochrome C. *Biosens. Bioelectron.* **2017**, *98*, 415-420.
6. Wen, Q.; Zhang, X.; Cai, J.; Yang, P. H. A novel strategy for real-time and in situ detection of cytochrome c and caspase-9 in Hela cells during apoptosis. *Analyst* **2014**, *139*, 2499-2506.
7. Yan, Y. J., He, X. W., Li, W. Y. & Zhang, Y. K. Nitrogen-doped graphene quantum dots-labeled epitope imprinted polymer with double templates via the metal chelation for specific recognition of cytochrome c. *Biosens. Bioelectron.* **2017**, *91*, 253-261.
8. Liu, J. M.; Yan, X. P. Ultrasensitive, selective and simultaneous detection of cytochrome c and insulin based on immunoassay and aptamer-based bioassay in combination with Au/Ag nanoparticle tagging and ICP-MS detection. *J. Anal. At. Spectrom.* **2011**, *26*, 1191-1197.
